# Supplementary material for: Factors Affecting Anti-Glycan IgG and IgM Repertoires in Human Serum
Source: PubMed Central journal article supplement (PMC4726023; doi:10.1038/srep19509), 2016-01-19
Supplement: srep19509-s1.pdf [file srep19509-s1.pdf]

## Factors Affecting Anti-Glycan IgG and IgM Repertoires in Human Serum

---

**Saddam M. Muthana<sup>1,2</sup> and Jeffrey C. Gildersleeve<sup>1</sup>**

<sup>1</sup>Chemical Biology Laboratory, National Cancer Institute, NIH, 376 Boyles St., Frederick, MD  
21702, USA

<sup>2</sup>Chemistry Department, College of Science & General Studies, Alfaisal University, Riyadh,  
KSA

### **Table of Contents** **Page**

|                        |     |
|------------------------|-----|
| Sample collection..... | S2  |
| Table SI.....          | S3  |
| Figure S1.....         | S7  |
| Figure S2.....         | S8  |
| Figure S3.....         | S9  |
| Figure S4.....         | S10 |
| Figure S5.....         | S11 |
| Figure S6.....         | S12 |

## **Sample collection**

Sample processing and storage by both providers were similar except for how whole blood was clotted and centrifuged to obtain serum (room temperature for Valley Biomedical Products and Services versus 4 °C for Bioreclamation LLC). Briefly Blood was allowed to clot overnight at 4 °C (Bioreclamation) or at room temperature (Valley Biomedical Products and Services). The following day the serum is centrifuged, collected, and stored at -20 °C.

The validation set (n = 90) which included samples from both providers, 60 samples from Valley Biomedical Products and Services and 30 samples from Bioreclamation LLC was evaluated for whether differences in anti-glycan antibody signals due to possible differences in how the samples were collected. To assess the comparability of data obtained for serum from both providers, the average IgG and IgM intensities for each glycan in the array were calculated from each provider. The average IgG and IgM antibody signals were similar from both providers (Figure S5). The data suggests that sample collection and handling by the two providers in this study have minimal effect on anti-glycan antibody levels.

Table SI. List and description of sample characteristics from healthy individuals.

| Sample # | Sex | Race             | Age | Blood Type | Location  |
|----------|-----|------------------|-----|------------|-----------|
| 1        | M   | African-American | 32  | O          | Florida   |
| 2        | M   | Hispanic         | 46  | O          | Florida   |
| 3        | M   | Caucasian        | 44  | B          | Florida   |
| 4        | M   | African-American | 22  | O          | Florida   |
| 5        | M   | Caucasian        | 27  | AB         | Florida   |
| 6        | M   | African-American | 43  | O          | Florida   |
| 7        | M   | African-American | 25  | O          | Florida   |
| 8        | M   | Caucasian        | 29  | AB         | Florida   |
| 9        | M   | African-American | 26  | A          | Florida   |
| 10       | M   | Hispanic         | 34  | O          | Florida   |
| 11       | M   | Hispanic         | 23  | A          | Florida   |
| 12       | M   | Caucasian        | 33  | O          | Florida   |
| 13       | M   | Caucasian        | 41  | O          | Florida   |
| 14       | M   | Caucasian        | 23  | O          | Florida   |
| 15       | M   | Caucasian        | 49  | O          | Florida   |
| 16       | M   | African-American | 39  | A          | Florida   |
| 17       | M   | Hispanic         | 49  | A          | Florida   |
| 18       | M   | Caucasian        | 42  | A          | Florida   |
| 19       | M   | African-American | 21  | B          | Florida   |
| 20       | M   | African-American | 33  | A          | Florida   |
| 21       | F   | Caucasian        | 34  | AB         | Florida   |
| 22       | F   | Hispanic         | 34  | A          | Florida   |
| 23       | F   | African-American | 50  | A          | Tennessee |
| 24       | F   | African-American | 38  | AB         | Florida   |
| 25       | F   | Hispanic         | 43  | A          | Florida   |
| 26       | F   | Hispanic         | 36  | AB         | Florida   |
| 27       | F   | Hispanic         | 21  | AB         | Florida   |
| 28       | F   | Caucasian        | 28  | O          | Tennessee |
| 29       | F   | Caucasian        | 43  | A          | Tennessee |
| 30       | F   | African-American | 23  | AB         | Florida   |
| 31       | F   | Hispanic         | 42  | AB         | Florida   |
| 32       | F   | Hispanic         | 27  | A          | Florida   |
| 33       | F   | Caucasian        | 21  | A          | Tennessee |
| 34       | F   | Hispanic         | 38  | O          | Florida   |
| 35       | F   | Hispanic         | 41  | O          | Florida   |
| 36       | F   | African-American | 20  | B          | Tennessee |
| 37       | F   | African-American | 27  | AB         | Florida   |
| 38       | F   | Hispanic         | 41  | AB         | Tennessee |
| 39       | F   | Hispanic         | 23  | O          | Florida   |

---

|    |   |                  |    |    |           |
|----|---|------------------|----|----|-----------|
| 40 | F | African-American | 30 | B  | Tennessee |
| 41 | F | Caucasian        | 32 | A  | Tennessee |
| 42 | F | Caucasian        | 45 | AB | Tennessee |
| 43 | F | Caucasian        | 36 | O  | Tennessee |
| 44 | F | African-American | 43 | AB | Florida   |
| 45 | F | Caucasian        | 36 | B  | Tennessee |
| 46 | M | African-American | 25 | A  | Florida   |
| 47 | F | Hispanic         | 40 | A  | Florida   |
| 48 | M | African-American | 31 | B  | Florida   |
| 49 | F | Hispanic         | 30 | AB | Florida   |
| 50 | M | Hispanic         | 38 | O  | Florida   |
| 51 | F | African-American | 40 | B  | Tennessee |
| 52 | M | Hispanic         | 44 | O  | Florida   |
| 53 | F | Caucasian        | 32 | A  | Tennessee |
| 54 | M | Hispanic         | 24 | A  | Florida   |
| 55 | F | Caucasian        | 42 | A  | Tennessee |
| 56 | M | Caucasian        | 41 | B  | Florida   |
| 57 | F | Hispanic         | 22 | O  | Florida   |
| 58 | M | Caucasian        | 26 | O  | Florida   |
| 59 | F | African-American | 43 | O  | Tennessee |
| 60 | M | African-American | 40 | O  | Florida   |
| 61 | F | Caucasian        | 45 | O  | Tennessee |
| 62 | M | Caucasian        | 43 | O  | Florida   |
| 63 | F | Caucasian        | 23 | AB | Florida   |
| 64 | M | Caucasian        | 36 | O  | Florida   |
| 65 | F | Caucasian        | 20 | A  | Tennessee |
| 66 | M | African-American | 38 | O  | Florida   |
| 67 | F | Caucasian        | 34 | O  | Tennessee |
| 68 | M | Hispanic         | 22 | O  | Florida   |
| 69 | F | African-American | 42 | AB | Florida   |
| 70 | M | African-American | 40 | A  | Florida   |
| 71 | F | Hispanic         | 39 | AB | Florida   |
| 72 | M | African-American | 46 | O  | Florida   |
| 73 | F | African-American | 35 | AB | Florida   |
| 74 | M | Hispanic         | 45 | O  | Florida   |
| 75 | F | Caucasian        | 33 | A  | Tennessee |
| 76 | M | Hispanic         | 30 | A  | Florida   |
| 77 | F | Hispanic         | 37 | A  | Florida   |
| 78 | M | African-American | 23 | O  | Florida   |
| 79 | F | Hispanic         | 31 | AB | Florida   |
| 80 | M | Caucasian        | 50 | A  | Florida   |

---

---

|     |   |                  |    |    |           |
|-----|---|------------------|----|----|-----------|
| 81  | F | African-American | 47 | AB | Florida   |
| 82  | M | African-American | 20 | B  | Florida   |
| 83  | F | African-American | 38 | AB | Florida   |
| 84  | M | Hispanic         | 28 | A  | Florida   |
| 85  | F | Caucasian        | 30 | A  | Tennessee |
| 86  | M | Caucasian        | 29 | B  | Florida   |
| 87  | F | Hispanic         | 43 | A  | Florida   |
| 88  | M | Caucasian        | 38 | A  | Florida   |
| 89  | F | Caucasian        | 31 | O  | Tennessee |
| 90  | M | African-American | 43 | O  | Florida   |
| 91  | F | Hispanic         | 22 | O  | Florida   |
| 92  | M | Caucasian        | 34 | O  | Florida   |
| 93  | F | Hispanic         | 26 | O  | Florida   |
| 94  | M | African-American | 34 | B  | Florida   |
| 95  | F | Caucasian        | 50 | O  | Tennessee |
| 96  | M | Hispanic         | 48 | A  | Florida   |
| 97  | F | Caucasian        | 32 | A  | Tennessee |
| 98  | M | African-American | 45 | O  | Florida   |
| 99  | F | African-American | 28 | AB | Florida   |
| 100 | M | Caucasian        | 21 | O  | Florida   |
| 101 | F | African-American | 44 | A  | Tennessee |
| 102 | M | Hispanic         | 36 | A  | Florida   |
| 103 | F | African-American | 43 | AB | Florida   |
| 104 | M | Hispanic         | 27 | A  | Florida   |
| 105 | M | African-American | 25 | B  | Florida   |
| 106 | F | African-American | 29 | O  | -         |
| 107 | M | Hispanic         | 20 | O  | -         |
| 108 | M | Hispanic         | 34 | O  | -         |
| 109 | F | African-American | 36 | O  | -         |
| 110 | M | African-American | 42 | O  | -         |
| 111 | F | African-American | 40 | O  | -         |
| 112 | F | Hispanic         | 60 | O  | -         |
| 113 | M | African-American | 54 | O  | -         |
| 114 | F | Hispanic         | 55 | O  | -         |
| 115 | F | African-American | 27 | A  | -         |
| 116 | M | Caucasian        | 23 | A  | -         |
| 117 | F | Caucasian        | 38 | A  | -         |
| 118 | M | Hispanic         | 31 | A  | -         |
| 119 | M | African-American | 41 | A  | -         |
| 120 | F | African-American | 46 | A  | -         |
| 121 | M | Caucasian        | 58 | A  | -         |

---

---

|     |   |                  |    |    |   |
|-----|---|------------------|----|----|---|
| 122 | M | African-American | 65 | A  | - |
| 123 | F | Hispanic         | 41 | A  | - |
| 124 | M | Caucasian        | 42 | O  | - |
| 125 | F | Hispanic         | 42 | O  | - |
| 126 | M | African-American | 43 | B  | - |
| 127 | F | Hispanic         | 43 | AB | - |
| 128 | F | Caucasian        | 43 | AB | - |
| 129 | F | African-American | 43 | O  | - |
| 130 | M | Caucasian        | 44 | B  | - |
| 131 | F | Caucasian        | 45 | A  | - |
| 132 | M | Hispanic         | 46 | AB | - |
| 133 | M | Caucasian        | 49 | O  | - |
| 134 | M | Hispanic         | 49 | AB | - |
| 135 | F | African-American | 50 | B  | - |

---

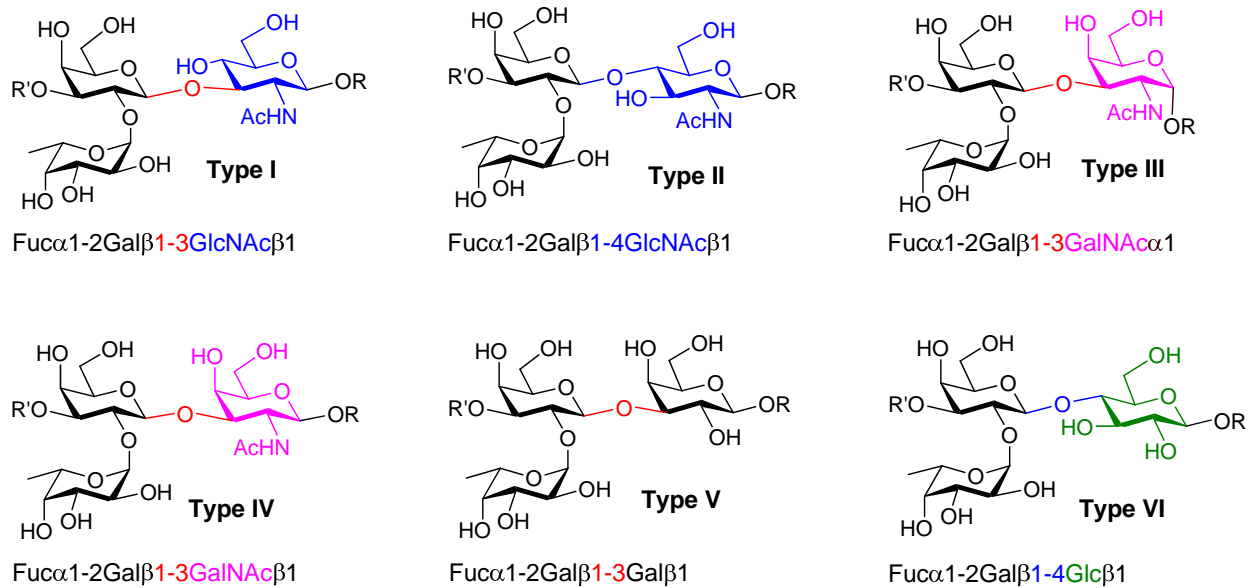

R = glycoprotein or glycolipid

R' = H for H-antigens, R' = GalNAc $\alpha$ 1 for A-antigens, or R' = Gal $\alpha$ 1 for B-antigens

Figure S1. Structures of the different types of ABH blood group antigens (I-VI).

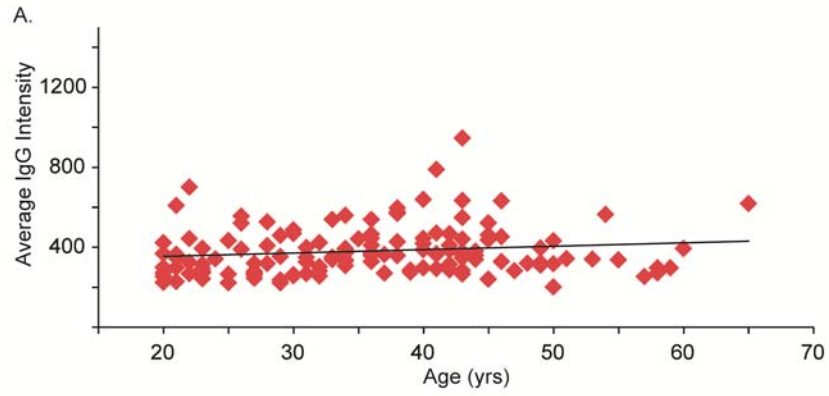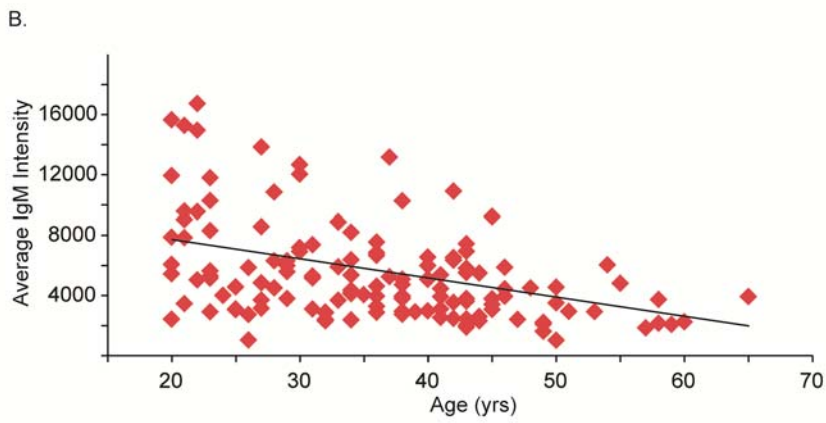

Figure S2. Age-related variations in anti-glycan antibodies in apparently healthy individuals (n = 135). **(A)** Scatter plot showing a relatively stable IgG antibody levels with age. **(B)** Scatter plot showing a drop in IgM antibody levels with age.



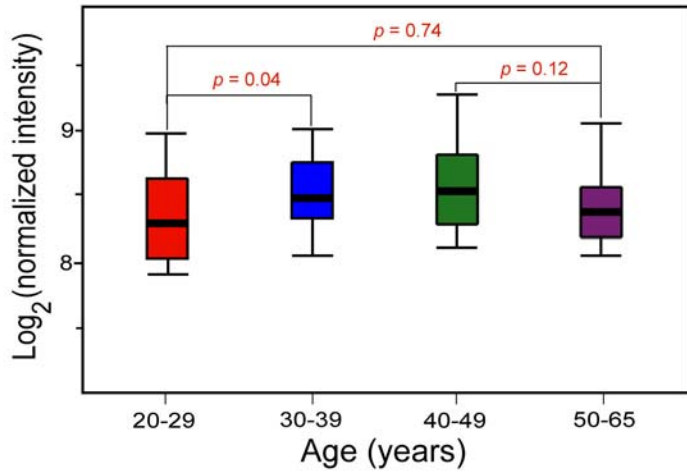

Figure S3. Box plots show minimum variation in anti-glycan IgG antibody levels with age when subjects were grouped every 10 years.

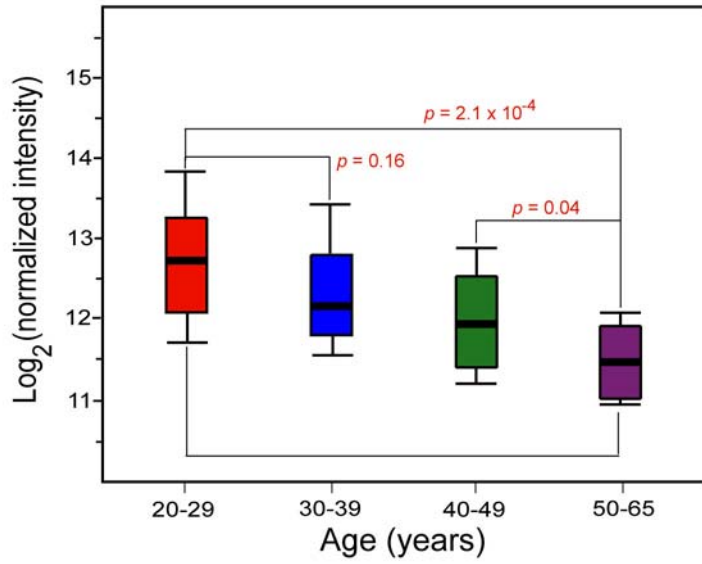

Figure S4. Box plots showing variations in anti-glycan IgM antibody levels with age when subjects were grouped every 10 years.

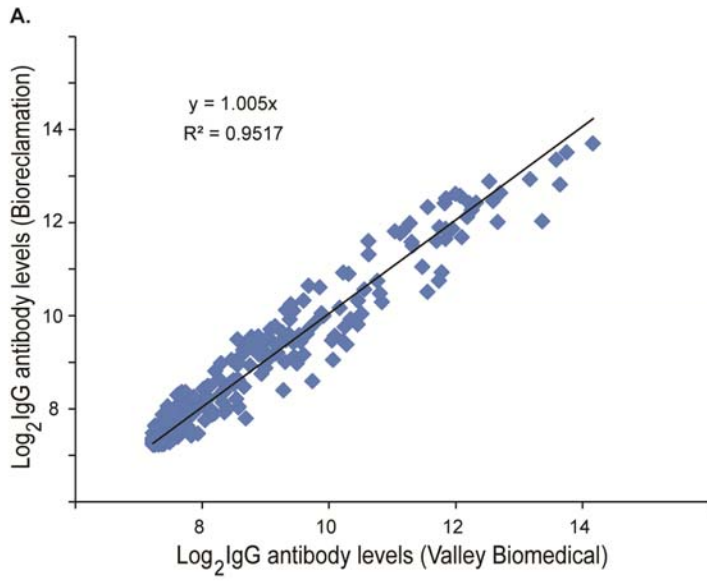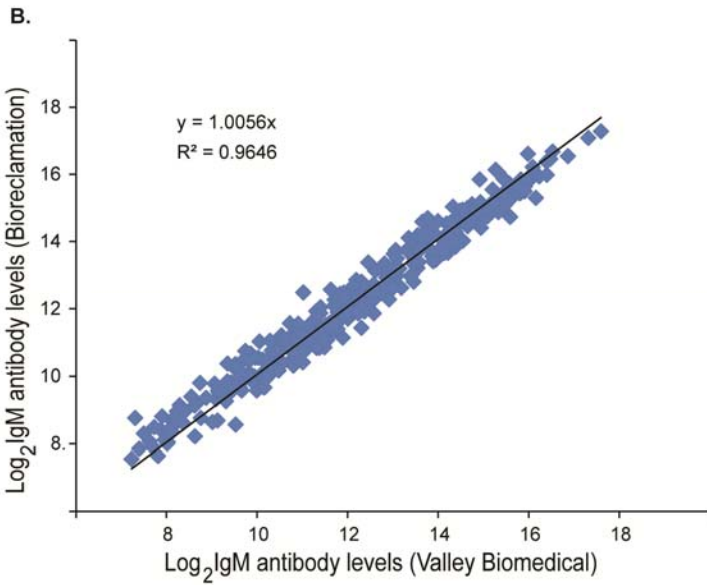

Figure S5. Scatter plots showing little variations in anti-glycan antibody levels due to sample collection and handling. **(A)** Level of IgG antibodies. **(B)** Level of IgM antibodies.

Pre-experiment images

Post-experiment images

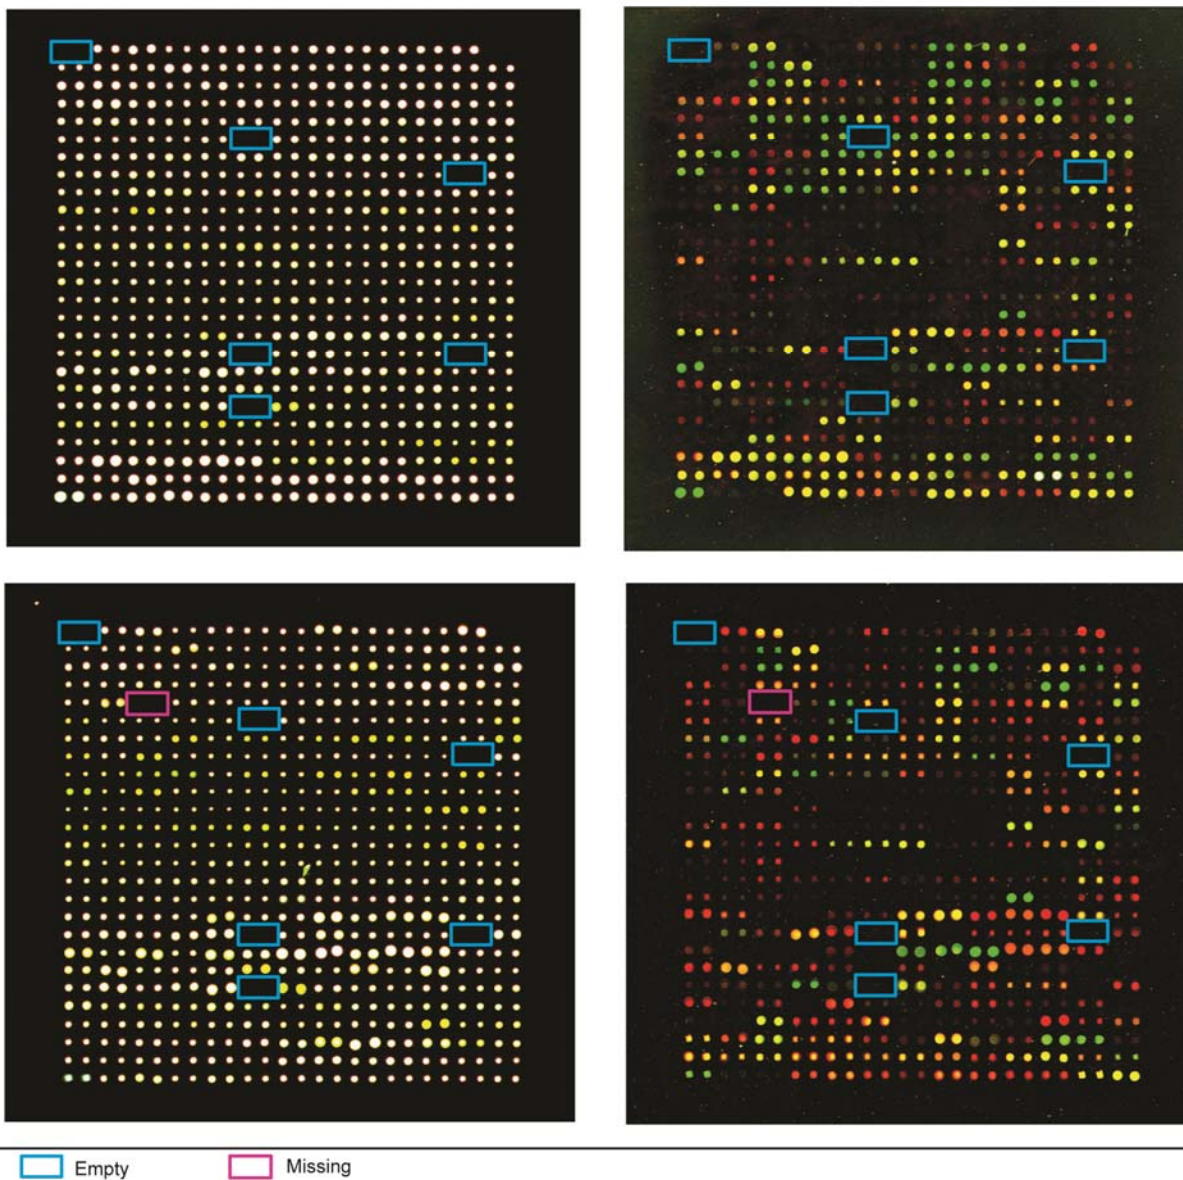

Figure S6. Representative examples of pre- and post-experimental array images. Signals in the Pre-experiment images are due to inclusion of a soluble fluorescent dye in the print buffer (the free acid of DyLight 649), which is washed away during blocking tp. Blue boxes indicate spots that were printed from empty wells, and pink boxes indicate spots that were missing during printing of the arrays.
